# Supplementary material for: Morphological and functional development of the spiral intestine in cloudy catshark (Scyliorhinus torazame)
Source: Oxford University Press journal article supplement (doi:10.1242/jeb.225557), 2020-01-01
Supplement: jeb225557supp.pdf [file jeb225557supp.pdf]

**Table S1. Primer sets used in the present study**

| Target                                          |            | Amplicon (bp)              |
|-------------------------------------------------|------------|----------------------------|
| Primer sets for molecular cloning (5' to 3')    |            |                            |
| <i>stpepT1</i>                                  | Sense:     | ATTCAGCCTGATCAGATGCAGA     |
|                                                 | Antisense: | CCTGGAGCACTGATTTTCATGTTG   |
| <i>stslc6a19</i>                                | Sense:     | TGGGCTGTGCTGTATGTATG       |
|                                                 | Antisense: | AGAAAGTCCGAGGCAGAATAAC     |
| <i>stactb</i>                                   | Sense:     | TGGTTGGTATGGGACAGAAAG      |
|                                                 | Antisense: | ATCTGCTGGAAGGTGGAAAG       |
| Primer sets for real-time qPCR assay (5' to 3') |            |                            |
| <i>stpepT1</i>                                  | Sense:     | ACCCTTCCTATCTTCCCTACC      |
|                                                 | Antisense: | CCTCAGATGGTGCCAGTAAAT      |
| <i>stslc6a19</i>                                | Sense:     | TGGGCTGTGCTGTATGTATG       |
|                                                 | Antisense: | TCTACCCTCCCTTATCTTGTC      |
| <i>stactb</i>                                   | Sense:     | CCTGGCATTGCAGACCGTAT       |
|                                                 | Antisense: | GCAATGATCTTGATTTTCATGGTACT |

Target gene abbreviations: PepT1, peptide transporter 1; Slc6a19, solute carrier family 6a19; actb,  $\beta$ -actin.

**Table S2. The accession numbers of genes used in the analysis**

| Gene name                                                                         | Accession Number |
|-----------------------------------------------------------------------------------|------------------|
| <i>Scyliorhinus torazame</i> Slc15a1                                              | LC507941         |
| <i>Sphyrna tiburo</i> Slc15a1                                                     | KX216515.1       |
| <i>Rhincodon typus</i> Slc15a1                                                    | XM_020512255.1   |
| <i>Callorhinchus milii</i> Slc15a1                                                | XM_007906296.1   |
| <i>Homo sapiens</i> solute carrier family 15 (oligopeptide transporter), member 1 | BC096329.3       |
| <i>Mus musculus</i> Pept1                                                         | AF205540.1       |
| <i>Meleagris gallopavo</i> PepT1                                                  | AY157977.1       |
| <i>Gallus gallus</i> PEPT1                                                        | KF366603.1       |
| <i>Oncorhynchus mykiss</i> SLC15A1                                                | KY775396.1       |
| <i>Danio rerio</i> Slc15a1                                                        | AY300011.1       |
| <i>Xenopus tropicalis</i> Slc15a1                                                 | XM_012957717.1   |
| <i>Rhinatrema bivittatum</i> SLC15A1                                              | XM_029604484.1   |
| <i>Protobothrops mucrosquamatus</i> SLC15A1                                       | XM_015810135.1   |
| <i>Chrysemys picta bellii</i> SLC15A1                                             | XM_005303909.3   |
| <i>Lepisosteus oculatus</i> Slc15a1                                               | XM_015363348.1   |
| <i>Latimeria chalumnae</i> SLC15A1                                                | XM_005992304.1   |
| <i>Scyliorhinus torazame</i> Slc6a19                                              | LC507942         |
| <i>Rhincodon typus</i> B(0)AT1                                                    | XP_020367154     |
| <i>Callorhinchus milii</i> B(0)AT1                                                | XP_007887825     |
| <i>Homo sapiens</i> SLC6A19                                                       | NM_001003841.3   |
| <i>Mus musculus</i> Slc6a19                                                       | NM_028878.4      |
| <i>Gallus gallus</i> SLC6A19                                                      | XM_419056.6      |
| <i>Meleagris gallopavo</i> SLC6A19                                                | XM_010708607.2   |
| <i>Lepisosteus oculatus</i> Slc6a19                                               | XM_006635651.2   |
| <i>Latimeria chalumnae</i> SLC6A19                                                | XM_014498080.1   |
| <i>Danio rerio</i> Slc6a19a.1                                                     | NM_001098178.1   |
| <i>Xenopus tropicalis</i> Slc6a19                                                 | NM_001127113.1   |
| <i>Pelodiscus sinensis</i> SLC6A19                                                | XM_006137063.3   |
| <i>Anolis carolinensis</i> Slc6a19                                                | XM_003219814.3   |
| <i>Nanorana parkeri</i> SLC6A19                                                   | XM_018568852.1   |
| <i>Homo sapiens</i> PepT2                                                         | NM_021082        |
| <i>Homo sapiens</i> Slc6a18                                                       | NM_182632        |

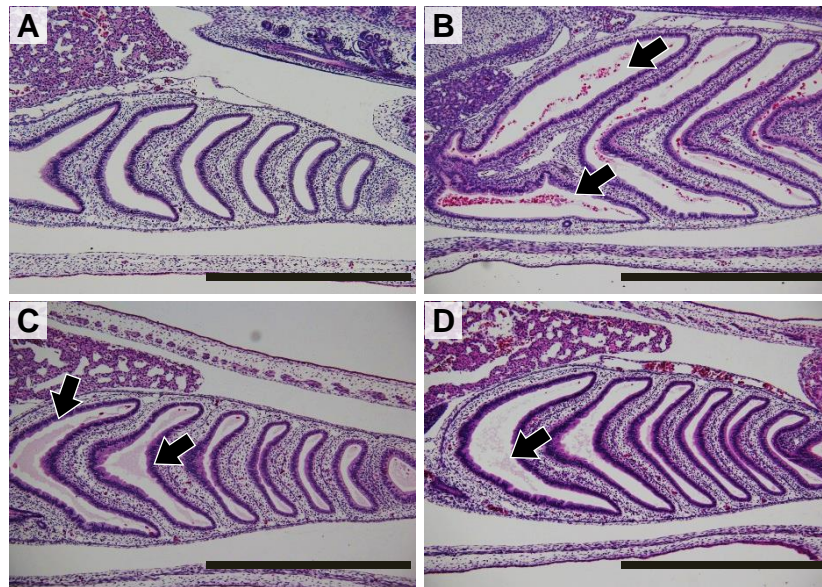

**Figure S1. Yolk inflow occurred nearly pre-hatching period.** Sections of the intestine. (A) and (B) Sections of the intestine of stage 31L embryos within 24 hours after pre-hatching. (C) and (D) Sections of the intestine of stage 31L embryos within 48 hours after pre-hatching. Arrows indicate yolk inside the intestinal lumen. Bar = 1mm.
